# Supplementary material for: A Common β-Sheet Architecture Underlies in Vitro and in Vivo β2-Microglobulin Amyloid Fibrils
Source: PubMed Central journal article supplement — J Biol Chem. 2008 Jun 20;283(25):17279–86. doi: 10.1074/jbc.M710351200 (PMC2427364; doi:10.1074/jbc.m710351200), 2008-06-20
Supplement: M710351200_1.pdf [file M710351200_1.pdf]

## **SUPPLEMENTARY INFORMATION**

A common  $\beta$ -sheet architecture underlies *in vitro* and *in vivo*  $\beta_2$ -microglobulin amyloid fibrils.

**Thomas R. Jahn, Glenys A. Tennent and Sheena E. Radford**

**Supplementary Table 1:** FTIR amide I' absorbance maxima of native  $\beta$ -sheet proteins as shown in Figure 5 of the above article.

| <b>Sample</b>          | <b>Amide I' max. (cm<sup>-1</sup>)</b> | <b>Reference</b> |
|------------------------|----------------------------------------|------------------|
| TTR                    | 1630                                   | (1)              |
| GFP                    | 1630                                   | (2)              |
| L-FABP                 | 1631                                   | (3)              |
| SNase                  | 1631                                   | (4)              |
| TNF- $\alpha$          | 1632                                   | (5)              |
| Choleratoxin subunit   | 1632                                   | (6)              |
| SAP                    | 1633                                   | (7)              |
| CRP                    | 1633                                   | (7)              |
| $\beta$ -lactoglobulin | 1634                                   | (8)              |
| Tendamistat            | 1635                                   | (9)              |
| PPE                    | 1636                                   | (10)             |
| RNaseA                 | 1637                                   | (11)             |
| CTX III                | 1638                                   | (12)             |
| SMA light chain        | 1638                                   | (13)             |
| BIF light chain        | 1638                                   | (14)             |
| LEN light chain        | 1638                                   | (15)             |
| Avidin                 | 1638                                   | (16)             |
| nFGF-1                 | 1639                                   | (17)             |
| bFGF                   | 1643                                   | (18)             |
| PDGF                   | 1643                                   | (19)             |

**Supplementary Table 2:** FTIR amide I' absorbance maxima for amyloid-like fibrils formed *in vitro* from different proteins and peptides<sup>1,2</sup> as shown in Figure 5 of the above article.

| Sample                         | Amide I' maximum (cm <sup>-1</sup> ) | Fibril growth condition*       | Reference |
|--------------------------------|--------------------------------------|--------------------------------|-----------|
| PolyK                          | 1611                                 | pH 11.2, 65°C                  | (20)      |
| AcP                            | 1613                                 | 25% (v/v) TFE, pD 5.5, 25°C    | (21)      |
| Lysozyme (WT)                  | 1614                                 | pD 1.5, 45°C                   | (22)      |
| PolyT                          | 1614                                 | pH 9.0, 65°C                   | (20)      |
| TTR                            | 1615                                 | pD 2.0, 37°C                   | (1)       |
| Endostatin                     | 1615                                 | pD 6.0, 37°C                   | (23)      |
| ApoA-1 (1-93)                  | 1615                                 | pD 4.0                         | (24)      |
| ADA2h                          | 1615                                 | pD 3.0, 90°C                   | (25)      |
| P53 <sup>tet</sup>             | 1616                                 | pH 4.0, 95°C                   | (26)      |
| PolyE                          | 1616                                 | pH 4.1, 95°C                   | (20)      |
| Apomyoglobin                   | 1617                                 | pH 9.0, 65°C                   | (27)      |
| Abri peptide                   | 1617                                 | pH 9.0, 37°C                   | (28)      |
| Adenovirus fibre peptide       | 1618                                 | pure D <sub>2</sub> O          | (29)      |
| SH3                            | 1618                                 | pH 1.2, 35°C                   | (30)      |
| $\alpha$ -chymotrypsin         | 1619                                 | 35% (v/v) TFE, 25°C            | (31)      |
| PrP (106-126)                  | 1620                                 | pH 6.5, 25°C                   | (32)      |
| Amylin (21-29)                 | 1620                                 | pD 5.5                         | (33)      |
| $\beta$ -lactoglobulin         | 1620                                 | 50% (v/v) ethanol, pH 8.0      | (34)      |
| Calcitonin                     | 1620                                 | pH 7.4, 22°C                   | (35)      |
| CspB-1                         | 1620                                 | 10% CH <sub>3</sub> CN, pH 4.0 | (36)      |
| Huntingtin                     | 1620                                 | pH 8.0, RT                     | (37)      |
| PABPN1                         | 1621                                 | pH 7.4, 37°C                   | (38)      |
| Synthetic VT peptide           | 1621                                 | pH 2.2                         | (39)      |
| PrP (91-231)                   | 1622                                 | pH 3.0, RT                     | (40)      |
| A $\beta$ <sub>42</sub>        | 1622                                 | pD 7.5, RT                     | (41)      |
| A $\beta$ <sub>40</sub>        | 1623                                 | pD 7.5, RT                     | (41)      |
| $\beta$ <sub>2m</sub> (20-41)  | 1624                                 | 20% (v/v) TFE, pH 2.0, 25°C    | (42)      |
| Tau fragment (VQIVSK)          | 1624                                 | pH 7.2, RT                     | (43)      |
| TTR                            | 1625                                 | pH 4.4, 37°C                   | (44)      |
| Histone                        | 1625                                 | pH 2.0, 37°C                   | (45)      |
| BIF light chain                | 1625                                 | pH 7.4, 37°C                   | (14)      |
| NFGF-1                         | 1625                                 | 15% (v/v) TFE                  | (17)      |
| TGFB peptide                   | 1625                                 | pH 7.4                         | (46)      |
| STVIII                         | 1625                                 | pH 2.6, RT                     | (47)      |
| SMA light chain                | 1627                                 | pH 7.4, 32°C                   | (13)      |
| LEN light chain                | 1627                                 | pH 2.0, 37°C                   | (15)      |
| Lactoferrin peptide (NAGDVAFV) | 1627                                 | pH 7.4, 37°C                   | (48)      |
| PrP (23-144)                   | 1628                                 | pH 6.5, 25°C                   | (32)      |
| Insulin (B-chain)              | 1628                                 | pH 1.6, 37°C                   | (49)      |
| Glucagon                       | 1629                                 | pH 2.5, 25°C                   | (50)      |
| $\alpha$ -synuclein            | 1629                                 | pH 7.5, RT                     | (51)      |
| Pmel17                         | 1629                                 | pH 7.4                         | (52)      |
| Insulin                        | 1630                                 | pH 1.6, 37°C                   | (49)      |
| Lysozyme (Asp67His)            | 1630                                 | pH 7.0, 62°C                   | (53)      |
| $\alpha$ -lactalbumin          | 1631                                 | pH 2.0, 37°C                   | (54)      |

\* RT = room temperature; TFE = trifluoroethanol

(1) Fibrils formed *in vitro* from pure apomyoglobin (horse heart; pH 9, 60°C), insulin (bovine pancreas; pH 2) and lysozyme (hen egg; pH 2, 60°C) (results not shown) were examined by ATR-FTIR spectroscopy, according to the Methods described in this paper, and gave rise to spectra with amide I' absorbance maxima at frequencies comparable to those already published and cited above.

(2) Only a few of the precursor proteins shown above are associated with amyloidosis, others are either associated with different types of protein misfolding disorders or are not known to be associated with any disorder. In many cases above, the genuine amyloid-like characteristics of the fibrils have not been comprehensively investigated.

## References:

1. Zandomenighi, G., Krebs, M. R., McCammon, M. G., and Fandrich, M. (2004) *Protein Sci* **13**, 3314-3321
2. Fukuda, H., Arai, M., and Kuwajima, K. (2000) *Biochemistry* **39**, 12025-12032
3. Muga, A., Cistola, D. P., and Mantsch, H. H. (1993) *Biochim Biophys Acta* **1162**, 291-296
4. From, N. B., and Bowler, B. E. (1998) *Biochemistry* **37**, 1623-1631
5. Narhi, L. O., Philo, J. S., Li, T., Zhang, M., Samal, B., and Arakawa, T. (1996) *Biochemistry* **35**, 11454-11460
6. Surewicz, W. K., Leddy, J. J., and Mantsch, H. H. (1990) *Biochemistry* **29**, 8106-8111
7. Dong, A., Caughey, W. S., and Du Clos, T. W. (1994) *J Biol Chem* **269**, 6424-6430
8. Dong, A., Matsuura, J., Allison, S. D., Chrisman, E., Manning, M. C., and Carpenter, J. F. (1996) *Biochemistry* **35**, 1450-1457
9. Zscherp, C., Aygun, H., Engels, J. W., and Mantele, W. (2003) *Biochim Biophys Acta* **1651**, 139-145
10. Byler, D. M., Wilson, R. M., Randall, C. S., and Sokoloski, T. D. (1995) *Pharm Res* **12**, 446-450
11. Panick, G., and Winter, R. (2000) *Biochemistry* **39**, 1862-1869
12. Sivaraman, T., Kumar, T. K., Jayaraman, G., Han, C. C., and Yu, C. (1997) *Biochem J* **321 ( Pt 2)**, 457-464
13. Kim, Y. S., Randolph, T. W., Stevens, F. J., and Carpenter, J. F. (2002) *J Biol Chem* **277**, 27240-27246
14. Kim, Y., Wall, J. S., Meyer, J., Murphy, C., Randolph, T. W., Manning, M. C., Solomon, A., and Carpenter, J. F. (2000) *J Biol Chem* **275**, 1570-1574
15. Souillac, P. O., Uversky, V. N., and Fink, A. L. (2003) *Biochemistry* **42**, 8094-8104
16. Surewicz, W. K., Szabo, A. G., and Mantsch, H. H. (1987) *Eur J Biochem* **167**, 519-523
17. Srisailam, S., Kumar, T. K., Rajalingam, D., Kathir, K. M., Sheu, H. S., Jan, F. J., Chao, P. C., and Yu, C. (2003) *J Biol Chem* **278**, 17701-17709
18. Dukor, R. K., Pancoska, P., Keiderling, T. A., Prestrelski, S. J., and Arakawa, T. (1992) *Arch Biochem Biophys* **298**, 678-681
19. Prestrelski, S. J., Arakawa, T., Kenney, W. C., and Byler, D. M. (1991) *Arch Biochem Biophys* **285**, 111-115
20. Fandrich, M., and Dobson, C. M. (2002) *Embo J* **21**, 5682-5690
21. Chiti, F., Webster, P., Taddei, N., Clark, A., Stefani, M., Ramponi, G., and Dobson, C. M. (1999) *Proc Natl Acad Sci U S A* **96**, 3590-3594
22. Frare, E., Mossuto, M. F., Polverino de Laureto, P., Dumoulin, M., Dobson, C. M., and Fontana, A. (2006) *J Mol Biol* **361**, 551-561
23. He, Y., Zhou, H., Tang, H., and Luo, Y. (2006) *J Biol Chem* **281**, 1048-1057
24. Andreola, A., Bellotti, V., Giorgetti, S., Mangione, P., Obici, L., Stoppini, M., Torres, J., Monzani, E., Merlini, G., and Sunde, M. (2003) *J Biol Chem* **278**, 2444-2451
25. Villegas, V., Zurdo, J., Filimonov, V. V., Aviles, F. X., Dobson, C. M., and Serrano, L. (2000) *Protein Sci* **9**, 1700-1708
26. Lee, A. S., Galea, C., DiGiammarino, E. L., Jun, B., Murti, G., Ribeiro, R. C., Zambetti, G., Schultz, C. P., and Kriwacki, R. W. (2003) *J Mol Biol* **327**, 699-709
27. Fandrich, M., Forge, V., Buder, K., Kittler, M., Dobson, C. M., and Diekmann, S. (2003) *Proc Natl Acad Sci U S A* **100**, 15463-15468
28. El-Agnaf, O. M., Sheridan, J. M., Sidera, C., Siligardi, G., Hussain, R., Haris, P. I., and Austen, B. M. (2001) *Biochemistry* **40**, 3449-3457
29. Papanikolopoulou, K., Schoehn, G., Forge, V., Forsyth, V. T., Riek, C., Hernandez, J. F., Ruigrok, R. W., and Mitraki, A. (2005) *J Biol Chem* **280**, 2481-2490

30. Zurdo, J., Guijarro, J. I., and Dobson, C. M. (2001) *J Am Chem Soc* **123**, 8141-8142
31. Pallares, I., Vendrell, J., Aviles, F. X., and Ventura, S. (2004) *J Mol Biol* **342**, 321-331
32. Kundu, B., Maiti, N. R., Jones, E. M., Surewicz, K. A., Vanik, D. L., and Surewicz, W. K. (2003) *Proc Natl Acad Sci U S A* **100**, 12069-12074
33. Tracz, S. M., Abedini, A., Driscoll, M., and Raleigh, D. P. (2004) *Biochemistry* **43**, 15901-15908
34. Renard, D., Robert, P., Garnier, C., Dufour, E., and Lefebvre, J. (2000) *J Biotechnol* **79**, 231-244
35. Arvinte, T., Cudd, A., and Drake, A. F. (1993) *J Biol Chem* **268**, 6415-6422
36. Wilkins, D. K., Dobson, C. M., and Gross, M. (2000) *Eur J Biochem* **267**, 2609-2616
37. Poirier, M. A., Li, H., Macosko, J., Cai, S., Amzel, M., and Ross, C. A. (2002) *J Biol Chem* **277**, 41032-41037
38. Scheuermann, T., Schulz, B., Blume, A., Wahle, E., Rudolph, R., and Schwarz, E. (2003) *Protein Sci* **12**, 2685-2692
39. Janek, K., Behlke, J., Zipper, J., Fabian, H., Georgalis, Y., Beyermann, M., Bienert, M., and Krause, E. (1999) *Biochemistry* **38**, 8246-8252
40. Tattum, M. H., Cohen-Krausz, S., Thumanu, K., Wharton, C. W., Khalili-Shirazi, A., Jackson, G. S., Orlova, E. V., Collinge, J., Clarke, A. R., and Saibil, H. R. (2006) *J Mol Biol* **357**, 975-985
41. Koppaka, V., Paul, C., Murray, I. V., and Axelsen, P. H. (2003) *J Biol Chem* **278**, 36277-36284
42. Yamaguchi, K., Takahashi, S., Kawai, T., Naiki, H., and Goto, Y. (2005) *J Mol Biol* **352**, 952-960
43. Rojas Quijano, F. A., Morrow, D., Wise, B. M., Brancia, F. L., and Goux, W. J. (2006) *Biochemistry* **45**, 4638-4652
44. Cordeiro, Y., Kraineva, J., Suarez, M. C., Tempesta, A. G., Kelly, J. W., Silva, J. L., Winter, R., and Foguel, D. (2006) *Biophys J* **91**, 957-967
45. Munishkina, L. A., Fink, A. L., and Uversky, V. N. (2004) *J Mol Biol* **342**, 1305-1324
46. Schmitt-Bernard, C. F., Chavanieu, A., Herrada, G., Subra, G., Arnaud, B., Demaille, J. G., Calas, B., and Argiles, A. (2002) *Eur J Biochem* **269**, 5149-5156
47. Lopez De La Paz, M., Goldie, K., Zurdo, J., Lacroix, E., Dobson, C. M., Hoenger, A., and Serrano, L. (2002) *Proc Natl Acad Sci U S A* **99**, 16052-16057
48. Nilsson, M. R., and Dobson, C. M. (2003) *Biochemistry* **42**, 375-382
49. Hong, D. P., and Fink, A. L. (2005) *Biochemistry* **44**, 16701-16709
50. Pedersen, J. S., Dikov, D., Flink, J. L., Hjuler, H. A., Christiansen, G., and Otzen, D. E. (2006) *J Mol Biol* **355**, 501-523
51. Munishkina, L. A., Phelan, C., Uversky, V. N., and Fink, A. L. (2003) *Biochemistry* **42**, 2720-2730
52. Fowler, D. M., Koulov, A. V., Alory-Jost, C., Marks, M. S., Balch, W. E., and Kelly, J. W. (2006) *PLoS Biol* **4**, e6
53. Booth, D. R., Sunde, M., Bellotti, V., Robinson, C. V., Hutchinson, W. L., Fraser, P. E., Hawkins, P. N., Dobson, C. M., Radford, S. E., Blake, C. C., and Pepys, M. B. (1997) *Nature* **385**, 787-793
54. Goers, J., Permyakov, S. E., Permyakov, E. A., Uversky, V. N., and Fink, A. L. (2002) *Biochemistry* **41**, 12546-12551
